# Supplementary figures and images for: Microstructural and Thermal Transport Properties of Regioregular Poly(3-hexylthiophene-2,5-diyl) Thin Films
Source: MDPI journal article supplement (doi:10.3390/ma15217700), 2022-11-02

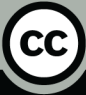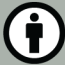

BY

Supplement: s1 [file s1]

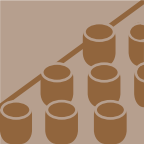

*materials*

Supplement: s1 [file s1]

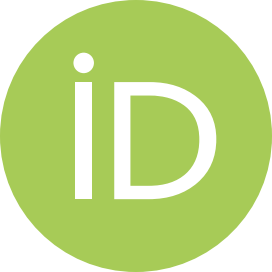

Supplement: s1 [file s1]
